# Supplementary material
Source: PubMed Central journal article supplement (PMC6434117)
Supplement: IAI.00851-18-s0001.pdf [file IAI.00851-18-s0001.pdf]

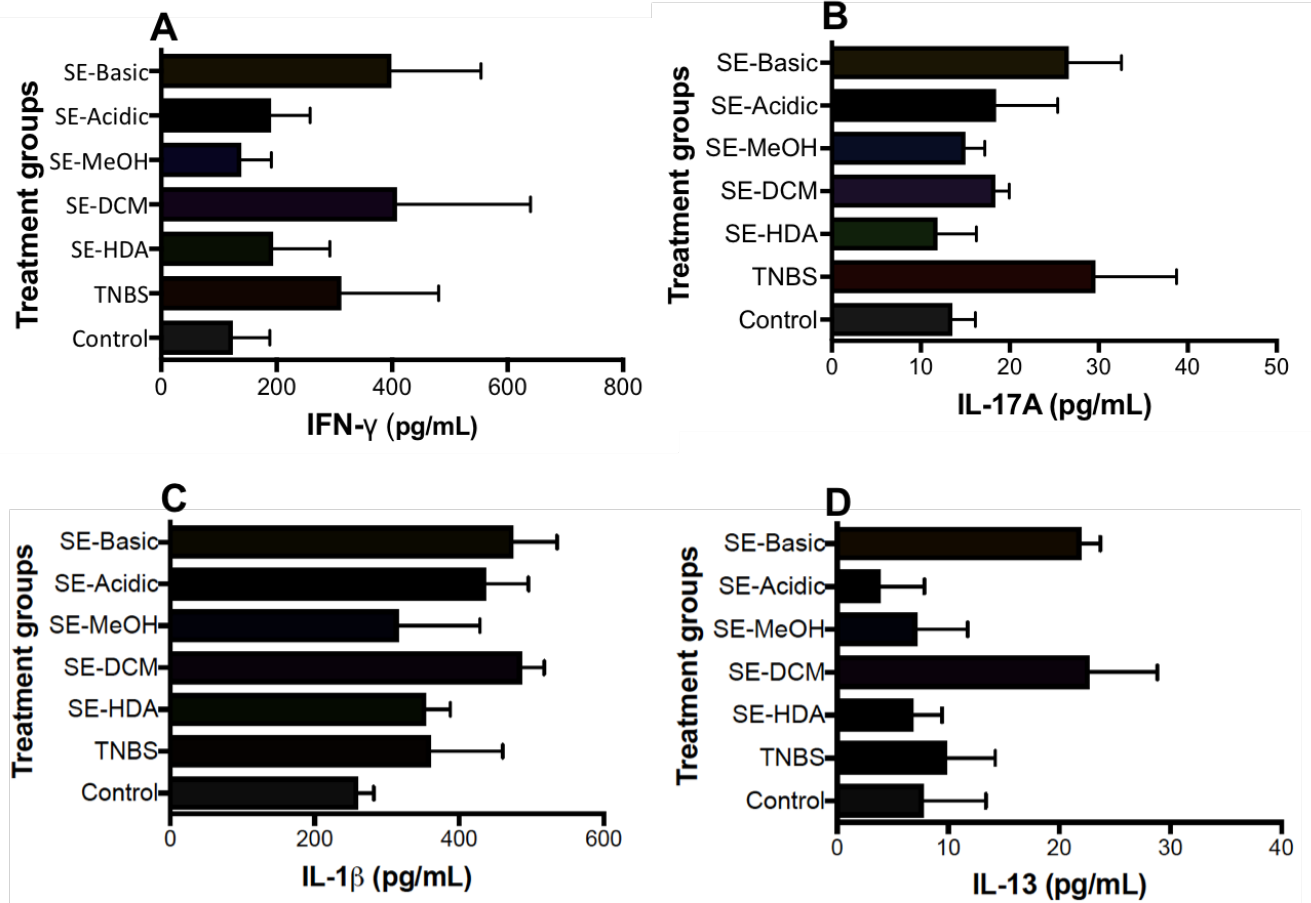

**FIG S1.** Cytokine profile of mice treated with LMWM-SE of *A. caninum* (N = 10). A) IFN- $\gamma$ . B) IL-17A. C) IL-1 $\beta$ . D) IL-13. Statistical analyses were performed using Graphpad Prism 7 (unpaired and nonparametric Mann-Whitney t-test) All were groups were statistically insignificant ( $P < 0.05$ ) but showed reduction trends in cytokine production.
