# Supplementary material
Source: PubMed Central journal article supplement (PMC6434117)
Supplement: IAI.00851-18-s0002.pdf [file IAI.00851-18-s0002.pdf]

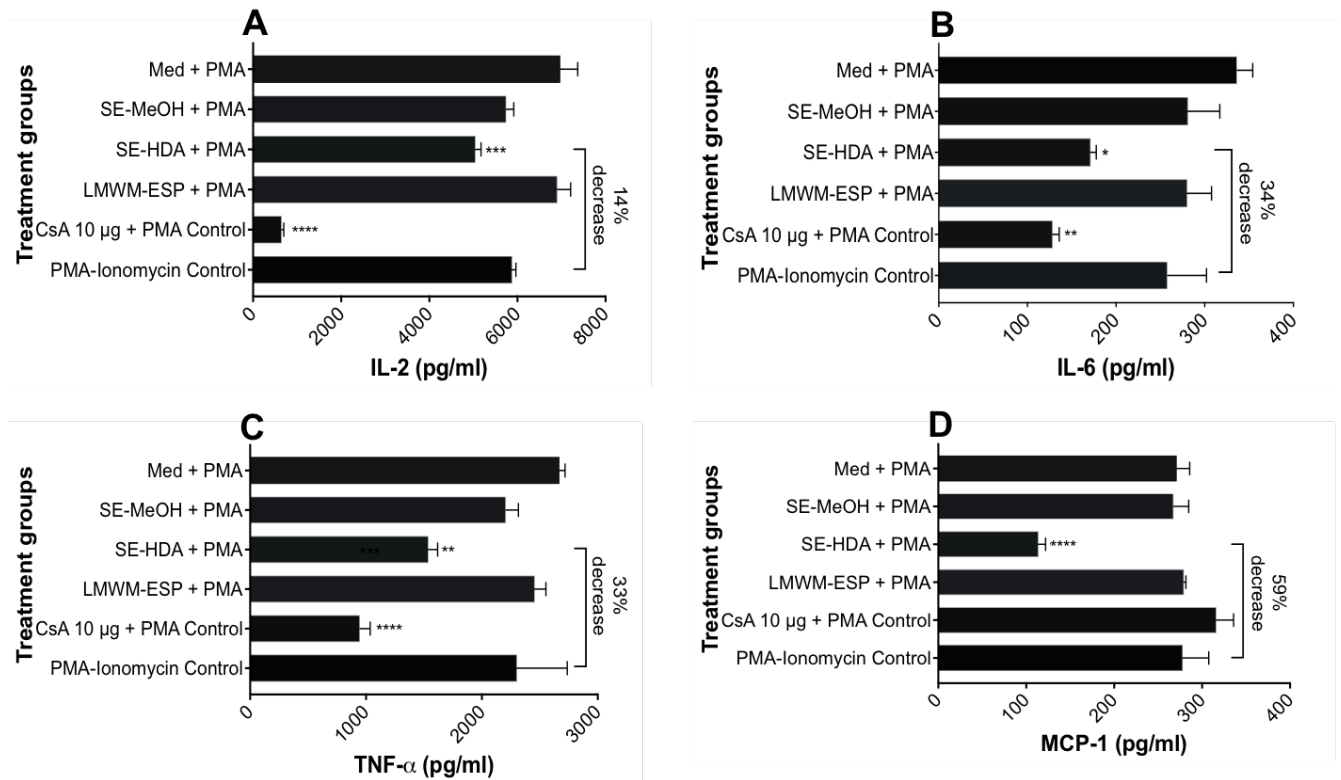

**FIG S2.** Co-culture of human PBMCs with *A. caninum*-derived LMWM-ESP, SE-MeOH and SE-HDA at a final concentration of 20 µg/ml prior to stimulation with PMA-Ionomycin resulted in a 14% reduction in IL-2 (A), 34% reduction in IL-6 (B), 33% reduction in TNF-α (C) and 59% reduction in monocyte chemoattractant protein-1 (MCP-1) (D). Statistical analyses were performed using Graphpad Prism 7 (one-way ANOVA, \*P<0.05, \*\*P < 0.001, \*\*\*P<0.0006, \*\*\*\*P < 0.0001).
