# Supplementary material
Source: PubMed Central journal article supplement (PMC6434117)
Supplement: IAI.00851-18-s0004.pdf [file IAI.00851-18-s0004.pdf]

**Table S2:** Fatty acids detected by GC-MS in LMWM-SE and the LMWM-ESP of *A.**caninum*

| Putative fatty acid             | Somatic tissue extract |                     | ESP extract         |
|---------------------------------|------------------------|---------------------|---------------------|
|                                 | Rt                     | (average peak area) | (average peak area) |
| Stearic acid (C18:0)*           | 16.70                  | 14,750,360          | 446,220             |
| Palmitic acid (C16:0)*          | 12.55                  | 10,036,880          | 272,877             |
| Elaidic acid (C18:1)            | 17.16                  | 2,513,152           | 0                   |
| Arachidic acid (C20:0)          | 19.65                  | 838,365             | 11,818              |
| Margaric acid (C17:0)           | 15.28                  | 613,914             | 9,488               |
| Myristic acid (C14:0)           | 11.32                  | 327,635             | 15,434              |
| Behenic acid (C22:0)            | 22.47                  | 184,279             | 0                   |
| Nonadecylic acid (C19:0)        | 18.18                  | 140,757             | 4,915               |
| Pentadecylic acid (C15:0)       | 12.55                  | 124,540             | 8,049               |
| Oleic acid (trans) (C18:1)*     | 17.36                  | 100,954             | 36,702              |
| Lignoceric acid (C24:0)         | 25.15                  | 83,380              | 0                   |
| Erucic acid (C22:1)             | 23.08                  | 56635               | 0                   |
| Petroselinic acid (cis) (C18:1) | 17.28                  | 55,532              | 0                   |
| Tricosylic acid (C23:0)         | 23.84                  | 51,683              | 0                   |
| Lauric acid (C12:0)*            | 9.25                   | 41,569              | 3,826               |
| Capric acid (C10:0)*            | 7.70                   | 40,272              | 16,411              |
| Heneicosylic acid (C21:0)       | 21.06                  | 35,664              | 12,399              |
| Caprylic acid (C8:0)*           | 6.87                   | 33,723              | 0                   |
| Pelargonic acid (C9:0)          | 7.20                   | 16,287              | 0                   |
| Tridecylic acid (C13:0)         | 10.19                  | 4,608               | 42,679              |
| Undecylic acid (C11:0)          | 8.42                   | 2,680               | 202,431             |

|                               |       |       |        |
|-------------------------------|-------|-------|--------|
| Nervonic acid (C24:1)         | 25.80 | 1,136 | 0      |
| Stearidonic acid (C18:4)      | 19.59 | 0     | 14,634 |
| Linoleic acid (C18:2)*        | 18.36 | 0     | 79,111 |
| Docosatetraenoic acid (C22:4) | 24.59 | 0     | 15,753 |

---

\*Reported anti-inflammatory activities of metabolites found in the non-polar somatic extracts of *A. caninum*. Rt = Retention time
